# Supplementary material
Source: Springer Nature journal article supplement (https://www.springermedizin.de/resource/supplementary/12875_2011_585_MOESM2_ESM.pdf/9434978)

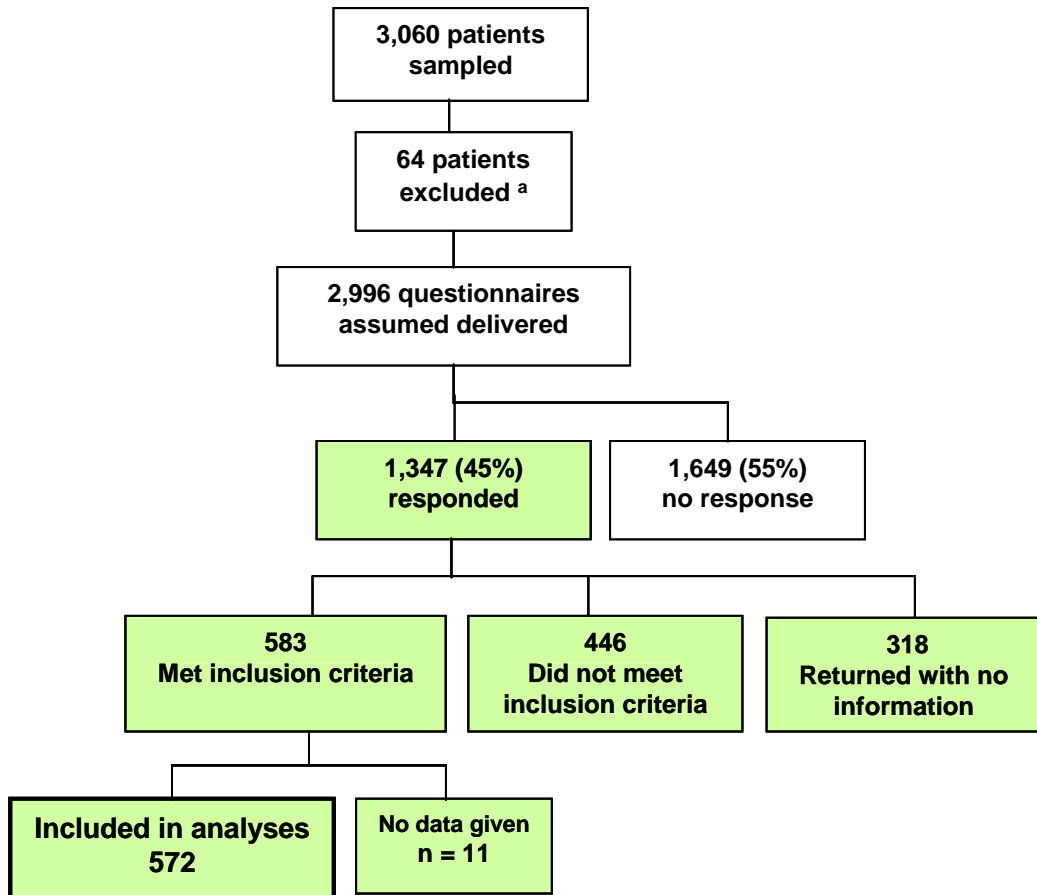

<sup>a</sup> Not At This Address, deceased

Supplement: MOESM2 [file 9434978]
